# Supplementary material for: Tools and best practices for retrotransposon analysis using high-throughput sequencing data
Source: PubMed Central journal article supplement (PMC6935493; doi:10.1186/s13100-019-0192-1), 2019-12-29

A

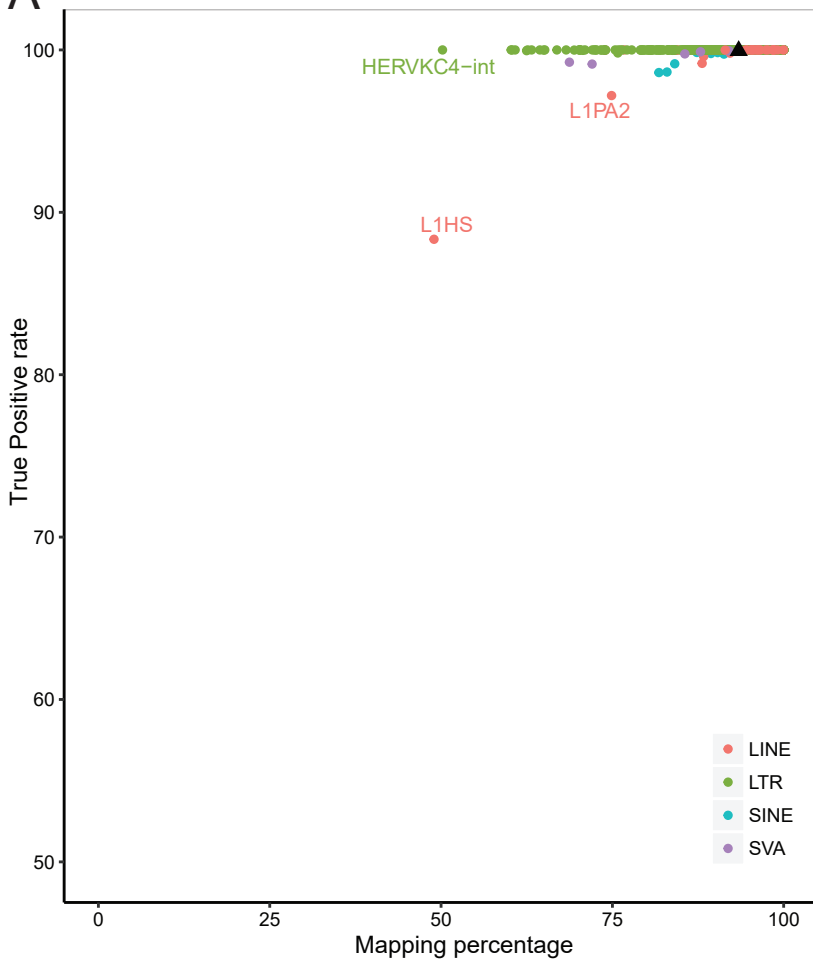

B

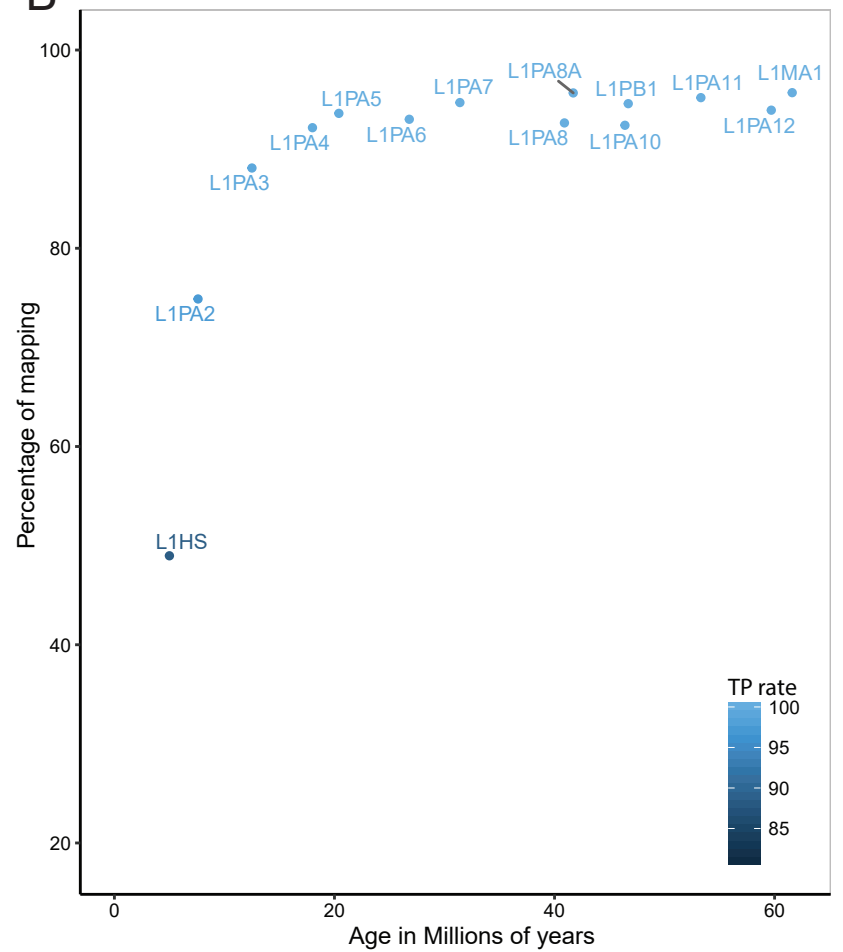

C

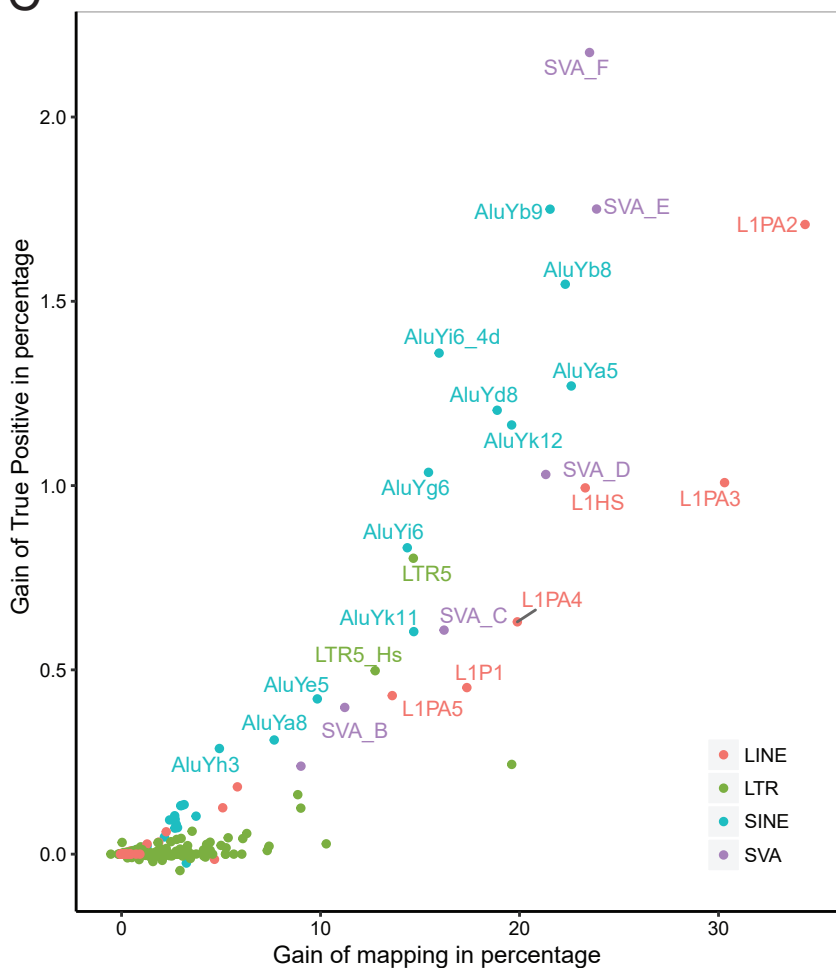

Supplement: 13100_2019_192_MOESM4_ESM.pdf [file 13100_2019_192_MOESM4_ESM.pdf]
