# Supplementary material for: Tools and best practices for retrotransposon analysis using high-throughput sequencing data
Source: PubMed Central journal article supplement (PMC6935493; doi:10.1186/s13100-019-0192-1), 2019-12-29
Supplement: 13100_2019_192_MOESM5_ESM.pdf [file 13100_2019_192_MOESM5_ESM.pdf]

# Tools and best practices for retrotransposon analysis using high-throughput sequencing data

---

Aurélie Teissandier<sup>1,2,3,4</sup>, Nicolas Servant<sup>1,23,\*</sup>, Emmanuel Barillot<sup>1,2,3</sup> and Deborah Bourc'his<sup>1,4 \*</sup>

## Supplementary Methods

### Mapping parameters

The following parameters were used for each mapper and mode.

#### Unique mode :

- Bowtie v1.0.0 : -m 1 -e 400 -v 3 --chunkmbs 100 -p 4 -I 0 -X 1000 --nomaqround -y --best --strata
- Novoalign v3.2.11 : -o SAM -r None -i 1000,200 -F STDFQ
- STAR v2.5.2b : --runThreadN 4 --outSAMtype BAM SortedByCoordinate --runMode alignReads --outFilterMultimapNmax 1 --outFilterMismatchNmax 3 --alignEndsType EndToEnd --alignIntronMax 1 --alignMatesGapMax 350
- Bowtie2 v2.1.0 : -N 1 -X 1000 -p 4 + post filtering keeping alignments when alignment score (AS tag) is higher than second valid alignment (XS tag).
- BWA aln v0.7.15 : -t 4 -n 3 + post filtering keeping alignments when XT tag is equal to U (meaning Unique alignment)
- BWA mem v0.7.15 : -t 4 -c 50000 -T 20 + post filtering keeping alignments when XT tag is equal to U (meaning Unique alignment)

#### Random mode :

- Bowtie v1.0.0 : -M 1 -e 400 -v 3 --chunkmbs 100 -p 4 -I 0 -X 1000 --nomaqround -y --best --strata
- Novoalign v3.2.11 : -o SAM -r Random -i 1000,200 -F STDFQ
- STAR v2.5.2b : --runThreadN 4 --outSAMtype BAM SortedByCoordinate --runMode alignReads --outFilterMultimapNmax 1000 --outSAMmultNmax 1 --outFilterMismatchNmax 3 --outMultimapperOrder Random --winAnchorMultimapNmax 1000 --alignEndsType EndToEnd --alignIntronMax 1 --alignMatesGapMax 350
- Bowtie2 v2.1.0 : -N 1 -X 1000 -p 4
- BWA aln v0.7.15 : -t 4 -n 3

36 • BWA mem v0.7.15 : -t 4 -c 50000 -T 20

37

38 **Multi-hit mode :**

39 • Bowtie v1.0.0 : -a -m 5000 -e 400 -v 3 --chunkmbs 100 -p 4 -l 0 -X 1000 --  
40 nomaqround -y --best --strata

41 • Novoalign v3.2.11 : -o SAM -r All 5000 -i 1000,200 -F STDFQ

42 • STAR v2.5.2b : --runThreadN 4 --outSAMtype BAM SortedByCoordinate --runMode  
43 alignReads --outFilterMultimapNmax 1000 --outFilterMismatchNmax 3 --  
44 outMultimapperOrder Random --winAnchorMultimapNmax 1000 --alignEndsType EndToEnd  
45 --alignIntronMax 1 --alignMatesGapMax 350

46 • Bowtie2 v2.1.0 : -N 1 -k 5000 -X 1000 -p 4

47

48 Due to complex TE content in the mouse genome, parameters were adapted using STAR  
49 when genome-wide libraries were mapped.

50 **Mouse genome-wide mapping :**

51 • STAR v2.5.2b unique mode : --runThreadN 4 --outSAMtype BAM Unsorted --  
52 runMode alignReads --outFilterMultimapNmax 5000 --outFilterMismatchNmax 3 --  
53 outMultimapperOrder Random --winAnchorMultimapNmax 5000 --alignEndsType EndToEnd  
54 --alignIntronMax 1 --alignMatesGapMax 350 --seedSearchStartLmax 30 --  
55 alignTranscriptsPerReadNmax 30000 --alignWindowsPerReadNmax 30000 --  
56 alignTranscriptsPerWindowNmax 300 --seedPerReadNmax 3000 --seedPerWindowNmax  
57 300 --seedNoneLociPerWindow 1000

58 • STAR v2.5.2b random mode : --runThreadN 4 --outSAMtype BAM Unsorted --  
59 runMode alignReads --outFilterMultimapNmax 5000 --outSAMmultNmax 1 --  
60 outFilterMismatchNmax 3 --outMultimapperOrder Random --winAnchorMultimapNmax 5000 -  
61 -alignEndsType EndToEnd --alignIntronMax 1 --alignMatesGapMax 350 --  
62 seedSearchStartLmax 30 --alignTranscriptsPerReadNmax 30000 --  
63 alignWindowsPerReadNmax 30000 --alignTranscriptsPerWindowNmax 300 --  
64 seedPerReadNmax 3000 --seedPerWindowNmax 300 --seedNoneLociPerWindow 1000

65 • STAR v2.5.2b multi-hit mode : --runThreadN 4 --outSAMtype BAM Unsorted --  
66 runMode alignReads --outFilterMultimapNmax 1 --outFilterMismatchNmax 3 --  
67 outMultimapperOrder Random --winAnchorMultimapNmax 5000 --alignEndsType EndToEnd  
68 --alignIntronMax 1 --alignMatesGapMax 350 --seedSearchStartLmax 30 --  
69 alignTranscriptsPerReadNmax 30000 --alignWindowsPerReadNmax 30000 --  
70 alignTranscriptsPerWindowNmax 300 --seedPerReadNmax 3000 --seedPerWindowNmax  
71 300 --seedNoneLociPerWindow 1000

72

73 **Quantification comparison**

74 The following tools and parameters were used :

75 ***repEnrich:***

76 bowtie --chunkmbs 10000 -p 4 -t -m 1 -S --max multimap.fastq -1 R1.fastq -2 R2.fastq >  
77 unique.sam ; samtools view -bS unique.sam > unique.bam ; samtools sort -o  
78 unique\_sort.bam unique.bam ; samtools index unique\_sort.bam ; RepEnrich.py rmskFile  
79 outDir nameSample genomeFolder multimap\_1.fastq --fastqfile2 multimap\_2.fastq  
80 unique\_sort.bam --cpus 4 --pairedend TRUE --is\_bed TRUE --allcountmethod TRUE

81 ***TEtools:***

82 TEcount.py -rosette rmskFile -column 2 -TE\_fasta rmskFile.fa -count TE.count -RNA  
83 R1.fastq -RNApair R2.fastq -bowtie2

84 ***TEtranscripts:***

85 STAR --readFilesIn R1.fastq R2.fastq --runThreadN 4 --outSAMtype BAM Unsorted --  
86 runMode alignReads --outFilterMultimapNmax 100 --winAnchorMultimapNmax 100 --  
87 outFilterMismatchNmax 3 --alignEndsType EndToEnd --alignIntronMax 1 --  
88 alignMatesGapMax 350 ; samtools sort -n -o multiple\_sort.bam multiple.bam ; TEtranscripts  
89 -t multiple\_sort.bam -c multiple\_sort.bam -TE rmsk.gtf --stranded no --format BAM --mode  
90 uniq|multi --GTF refGene.gtf --project myProject ;

91 ***SQUIRE:***

92 squire Map -1 R1.fastq -2 R2.fastq -o outSquire -f genomeSquire -r 100 -p 4 ; squire Count -  
93 m outSquire -f genomeSquire -r 100 -p 4 -o outSquire -c genomeCleanSquire

94 ***FeatureCounts Unique Alignments:***

95 featureCounts -F SAF -T 1 -s 0 -p -a rmsk.SAF -o outfeatureCounts.txt Input.bam

96 ***FeatureCounts Random Alignments:***

97 featureCounts -M -F SAF -T 1 -s 0 -p -a rmsk.SAF -o outfeatureCounts.txt Input.bam

98 ***FeatureCounts Multiple Alignments:***

99 featureCounts -M --fraction -F SAF -T 1 -s 0 -p -a rmsk.SAF -o outfeatureCounts.txt

100 Input.bam

101

## 102 **Supplementary Figure Legends**

103 **Supplementary Figure 1: Comparison of mapper efficiency with human simulated data.**  
104 **(A)** True Positive (TP) rate versus mapping percentage with chromosome 1 of the human  
105 genome. The dots are the average values of three independent simulated libraries. SE and PE  
106 refer to single end and paired end, respectively. **(B)** Use memory, run time and size of the BAM  
107 file with chromosome 1 of the human genome. The error bars correspond to standard deviation  
108 from three independent simulated libraries.

109

110 **Supplementary Figure 2: Comparison of the methods for the quantification of human**  
111 **retrotransposon families. (A)** Comparison of the estimated abundance versus the true  
112 abundance for different quantification methods using human simulated TE-derived library. An  
113 R-squared value ( $R^2$ ) was calculated to evaluate the correlation of estimated values between  
114 simulated values **(B)** Comparison of the estimated abundance versus the true abundance for  
115 TEtools and when randomly reported reads are used for the TE quantification with  
116 FeatureCounts (*FeatureCounts Random alignments*). A PE genome-wide library (10X  
117 coverage) was simulated using the human genome with STAR for the mapping.

118

119 **Supplementary Figure 3: Impact of read depth in TE families quantification. (A)** Estimated  
120 abundance for different quantification methods and true abundance (Simulated counts) using  
121 5X, 10X, 25X, 50X and 100X coverage on specific mouse TE families. Only these TE families  
122 were used for the quantification. **(B)** Same as in A), with specific human TE families.

123

124 **Supplementary Figure 4: Mappability of the different human retrotransposon families.**  
125 **(A)** True Positive (TP) rate versus mapping percentage per TE family using STAR and paired-  
126 end library and human simulated TE-derived reads. Black triangle represents the True Positive  
127 rate and percentage of mapping for the entire simulated library **(B)** Mapping percentage versus  
128 age of L1Md families. Dot colors represent the True Positive (TP) rate. Ages are obtained from  
129 previously published divergence analysis study (25) **(C)** Gain of True Positive in percentage  
130 versus gain of mapping in percentage when PE library are used in comparison to SE library.

131
